# Supplementary material
Source: PubMed Central journal article supplement (PMC7357473)
Supplement: AEM.00730-20-s0001.pdf [file AEM.00730-20-s0001.pdf]

Supplemental Materials for

## **Ethanol Metabolism Dynamics in *Clostridium***

### ***ljungdahlii* Grown on Carbon Monoxide**

*Zi-Yong Liu*<sup>1</sup>, *De-Chen Jia*<sup>2</sup>, *Kun-Di Zhang*<sup>3</sup>, *Hai-Feng Zhu*<sup>1</sup>, *Quan Zhang*<sup>4</sup>, *Wei-Hong Jiang*<sup>2</sup>, *Yang Gu*<sup>2\*</sup>, *Fu-Li Li*<sup>1\*</sup>

<sup>1</sup>Shandong Provincial Key Laboratory of Synthetic Biology, Key Laboratory of Biofuels, Qingdao Institute of Bioenergy and Bioprocess Technology, Chinese Academy of Sciences, 266101 Qingdao, P. R. China;

<sup>2</sup>Key Laboratory of Synthetic Biology, CAS Center for Excellence in Molecular Plant Sciences, Shanghai Institute of Plant Physiology and Ecology, Chinese Academy of Sciences, Shanghai 200032, China;

<sup>3</sup>State Key Laboratory of Microbial Technology, Shandong University, Qingdao, 250100, P. R. China;

<sup>4</sup>Sinopec Dalian (Fushun) Research Institute of Petroleum and Petrochemicals, Dalian 116045, P. R. China;

\*Corresponding author:

Fu-Li Li, Phone: +86 532-80662655; Fax: +86 532-80662778; Email: lifl@qibebt.ac.cn. Postal address: 189 Songling Rd., Qingdao 266101, P. R. China

Yang Gu, Phone: +86 21-54924178; Fax: +86 21-54924015; Email: Ygu02@sibs.ac.cn. Postal address: 300 Fenglin Rd., Shanghai 200032, P. R. China

Table S1 Primers used in the qPCR.

| <b>Gene locus</b>         | <b>Primer</b> | <b>Sequence (5'-3')</b> |
|---------------------------|---------------|-------------------------|
| CLJU_RS09865/CLJU_c20110  | aor1-F        | GCACCGCTTACAGGAACTATA   |
|                           | aor1-R        | ACTGGTGAATCAGCCTTATCC   |
| CLJU_RS01170/CLJU_c20210  | aor2-F        | TAGCAGCAGATGGATTGTCAC   |
|                           | aor2-R        | CAGGTACACCGTATGAGTCACA  |
| CLJU_RS08095/CLJU_c16510  | adhE1-F       | ATCAGTTGGTGGTGGCTCAG    |
|                           | adhE1-R       | TTCCTGCGGATGTTGCTACT    |
| CLJU_RS08100/CLJU_c016520 | adhE2-F       | GATCCAACCCTTGCTACA      |
|                           | adhE2-R       | GATGCTCATACATTACCCAC    |
| CLJU_RS01185/CLJU_c12780  | ack-F         | ATTTACAGCAGGACTTGGAG    |
|                           | ack-R         | GTGCTTATTTCTAGTGCCTC    |
| CLJU_RS01190/CLJU_c12770  | pta-RT-1      | AGAAGGGAATAACGCCAGAA    |
|                           | pta-RT-2      | TATGAACCGCACCTGAAACC    |
| CLJU_RS18530/CLJU_c37630  | folD-RT-1     | AACCAGTGGCAGATGCTATA    |
|                           | folD-RT-2     | CGTTTGCTCCAACCTCTTACT   |
| CLJU_RS18520/CLJU_c37610  | metF-RT-1     | AAAGATGCAGGATTAGAACC    |
|                           | metF-RT-2     | GCCACCTGTAATATCCCAAC    |
| CLJU_RS18540/CLJU_c37650  | fhs-RT-1      | AGCAAAGACCCAATACTCCT    |
|                           | fhs-RT-2      | TTTCCAAGACCTGGCATC      |
| CLJU_RS00045/CLJU_c00080  | 16S rRNA-F    | AGAGTTTGATCCTGGCTCAG    |
|                           | 16S rRNA-R    | TACGGCTACCTTGTTACGACT   |

Table S2 The expression profiles of the genes located in the central metabolic pathways during fermentation grown on CO of *C. ljungdahlii*.

| ORF                          | Gene and Protein                                                                       | RPKM <sup>c</sup>      |                        | Change fold <sup>a</sup> | No. <sup>b</sup> |
|------------------------------|----------------------------------------------------------------------------------------|------------------------|------------------------|--------------------------|------------------|
|                              |                                                                                        | Sta.<br><i>t</i> =96 h | Exp.<br><i>t</i> =48 h |                          |                  |
| <b>Wood-Ljungdal pathway</b> |                                                                                        |                        |                        |                          |                  |
| CLJU_RS04480/ CLJU_c09090    | NAD(P)/FAD-dependent oxidoreductase                                                    | 4222                   | 243                    | <b>-17.3</b>             | 1                |
| CLJU_RS04485/ CLJU_c09100    | nitrate reductase subunit beta                                                         | 4464                   | 259                    | <b>-17.2</b>             | 1                |
| CLJU_RS04490/ CLJU_c09110    | <i>cooS</i> , carbon-monoxide dehydrogenase catalytic subunit                          | 4109.5                 | 299.5                  | <b>-13.7</b>             | 1                |
| CLJU_RS18490/ CLJU_c37550    | <i>cdhC</i> , CO dehydrogenase/CO-methylating acetyl-CoA synthase complex subunit beta | 4282.5                 | 14842.5                | <b>3.5</b>               | 8                |
| CLJU_RS18495/ CLJU_c37560    | carbon monoxide dehydrogenase                                                          | 4657                   | 15325                  | <b>3.3</b>               | 8                |
| CLJU_RS18500/ CLJU_c37570    | acetyl-CoA synthase /synthase complex subunit gamma                                    | 5221.5                 | 10347                  | <b>2.0</b>               | 8                |
| CLJU_RS18505/ CLJU_c37580    | acetyl-CoA synthase /synthase complex subunit delta                                    | 4042.5                 | 10479                  | <b>2.6</b>               | 8                |
| CLJU_RS18510/ CLJU_c37590    | carbon monoxide dehydrogenase                                                          | 3177                   | 9011                   | <b>2.8</b>               | 8                |
| CLJU_RS18515/ CLJU_c37600    | <i>lpdA</i> , dihydrolipoyl dehydrogenase                                              | 4924                   | 10186.5                | <b>2.1</b>               | 7?               |
| CLJU_RS18520/ CLJU_c37610    | <i>metF</i> , 5,10-methylenetetrahydrofolate reductase                                 | 4580.5                 | 10922                  | <b>2.4</b>               | 6                |
| CLJU_RS18525/ CLJU_c37620    | hypothetical protein, 5,10-methylene-tetrahydrofolate                                  | 4516                   | 11381                  | <b>2.5</b>               | 5                |
| CLJU_RS18530/ CLJU_c37630    | <i>folD</i> , dehydrogenase/5,10-methylene-tetrahydrofolate cyclohydrolase             | 4306                   | 11045                  | <b>2.6</b>               | 4                |
| CLJU_RS18535/ CLJU_c37640    | sugar ABC transporter substrate-binding protein                                        | 8777                   | 23098.5                | <b>2.6</b>               |                  |
| CLJU_RS18540/ CLJU_c37650    | <i>fhs</i> , formate-tetrahydrofolate ligase                                           | 11884.5                | 33969                  | <b>2.9</b>               | 3                |
| CLJU_RS18545/ CLJU_c37660    | carbon monoxide dehydrogenase                                                          | 4673.5                 | 8737.5                 | <b>1.9</b>               | 8                |
| CLJU_RS18550/ CLJU_c37670    | <i>cooS</i> , carbon-monoxide dehydrogenase catalytic subunit                          | 10396.5                | 10251                  | <b>1.0</b>               | 8                |
| CLJU_RS04405/CLJU_c08930     | <i>fdh2</i> ,formate dehydrogenase subunit alpha                                       | 405                    | 206.5                  | <b>-2.0</b>              |                  |
| CLJU_RS09825/CLJU_c20040     | <i>fdh3</i> , formate dehydrogenase H subunit alpha selenocysteine-containing          | 1740.5                 | 2409.5                 | <b>1.4</b>               |                  |
| CLJU_RS03440/CLJU_c06990     | <i>fdh1</i> , formate dehydrogenase H subunit alpha selenocysteine-containing          | 1301.5                 | 527                    | <b>-2.5</b>              | 2                |
| CLJU_RS03445/CLJU_c07000     | <i>moeA</i> , molybdopterin molybdenumtransferase MoeA                                 | 344.5                  | 195                    | <b>-1.8</b>              | 2                |
| CLJU_RS03450/CLJU_c07010     | <i>mobB</i> , molybdopterin-guanine dinucleotide biosynthesis protein B                | 332                    | 204.5                  | <b>-1.6</b>              | 2                |
| CLJU_RS03455/CLJU_c07020     | <i>fdhD</i> , sulfurtransferase FdhD                                                   | 187                    | 116                    | <b>-1.6</b>              | 2                |
| CLJU_RS03460/CLJU_c07030     | NADH-quinone oxidoreductase subunit NuoE                                               | 640.5                  | 903                    | <b>1.4</b>               | 2                |
| CLJU_RS03465/CLJU_c07040     | NADH dehydrogenase                                                                     | 622                    | 764.5                  | <b>1.2</b>               | 2                |
| CLJU_RS03470/CLJU_c07050     | 2Fe-2S iron-sulfur cluster binding domain-containing protein                           | 964                    | 821                    | <b>-1.6</b>              | 2                |
| CLJU_RS03475/CLJU_c07060     | 4Fe-4S dicluster domain-containing protein                                             | 1094.5                 | 830.5                  | <b>-1.3</b>              | 2                |
| CLJU_RS03480/CLJU_c07070     | 4Fe-4S dicluster domain-containing protein                                             | 1702.5                 | 1121.5                 | <b>-1.5</b>              | 2                |
| CLJU_RS03485/CLJU_c07080     | 4Fe-4S dicluster domain-containing protein                                             | 2756                   | 1290.5                 | <b>-2.1</b>              | 2                |

#### AdhE and AOR pathway

|                          |                                                                    |         |        |             |    |
|--------------------------|--------------------------------------------------------------------|---------|--------|-------------|----|
| CLJU_RS08095/CLJU_c16510 | <i>adhE1</i> , bifunctional acetaldehyde-CoA/alcohol dehydrogenase | 266     | 4916.5 | <b>18.5</b> | 11 |
| CLJU_RS08100/CLJU_c16520 | <i>adhE2</i> , bifunctional acetaldehyde-CoA/alcohol dehydrogenase | 0       | 7      | <b>0</b>    |    |
| CLJU_RS09865/CLJU_c20110 | <i>aor1</i> , aldehyde ferredoxin oxidoreductase                   | 36.5    | 21.5   | <b>-1.7</b> |    |
| CLJU_RS09915/CLJU_c20210 | <i>aor2</i> , aldehyde ferredoxin oxidoreductase                   | 16796.5 | 4249   | <b>-4.0</b> | 12 |

#### Acetate biosynthesis pathway

|                          |                                          |       |        |            |    |
|--------------------------|------------------------------------------|-------|--------|------------|----|
| CLJU_RS06260/CLJU_c12770 | <i>pta</i> , phosphate acetyltransferase | 691.5 | 2110   | <b>3.1</b> | 9  |
| CLJU_RS06265/CLJU_c12780 | <i>ack</i> , acetate kinase              | 825   | 2241.5 | <b>2.7</b> | 10 |

Genes are listed in order of old and new ORF numbers; genes located in the same operon are assembled by same shading; ORF: Open reading frame; <sup>a</sup>: Data represent the values change fold of PRKM during exponential phase, as compared to those during stationary phase. The positive values represent the increased change fold during exponential phase. The negative values represent the decreased change fold during exponential phase; <sup>b</sup>: The number represents the correlation functional genes participating in the metabolic reactions in Figure 6; <sup>c</sup>: RPKM is the abbreviation of Reads per Kilobase per Million mapped reads.

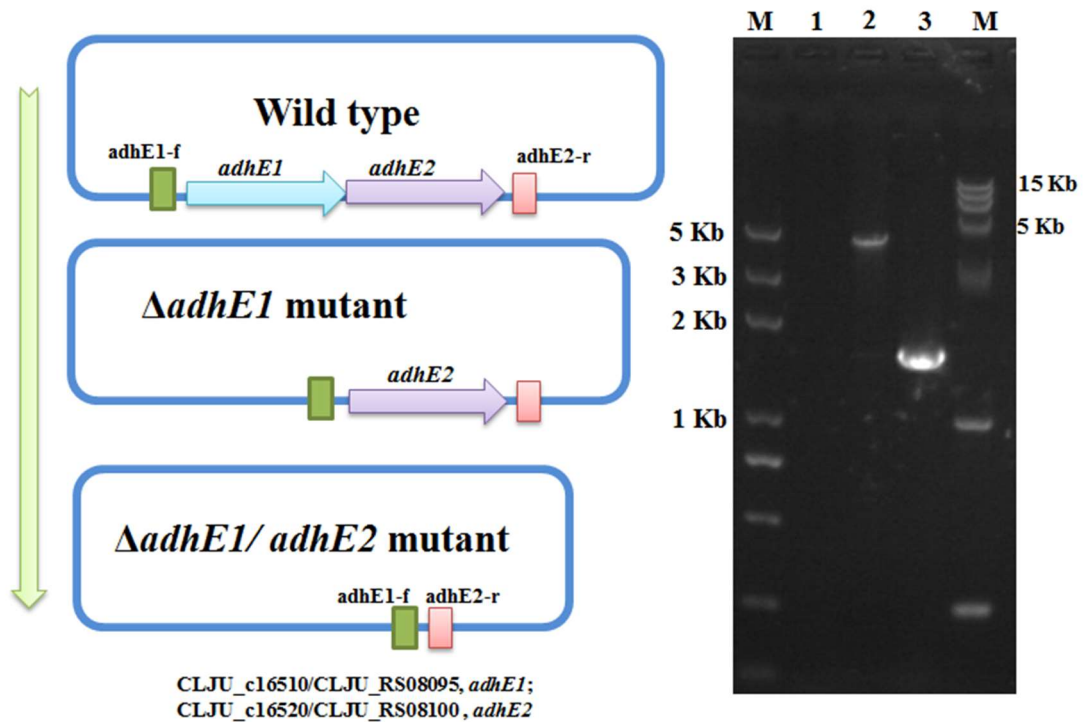

**Fig. S1** The schematic process of *adhE* deletion and PCR results of *C. ljungdahlii*. *adhE1* (1791269-1793881) and *adhE2* (1794033-1796666) are adjacent in the genome. The deletion fragments are located 1791272-1793770 ( $\Delta adhE1$ ) and 1791272-1796633 ( $\Delta adhE1+2$ ), respectively (Köpke et. al. 2010, Proc Natl Acad Sci 107:13087-13092. doi: 10.1073/pnas.1004716107). The PCR results and sequencing results showed that we obtained correct mutants. Left: adhE1-f and adhE2-r are primer names (Table S1), which used in the following PCR test. Right: M, marker; lane 1: wild type; lane 2:  $\Delta adhE1$ ; lane 3:  $\Delta adhE1+2$ ; The fragment of WT is too long to obtain.

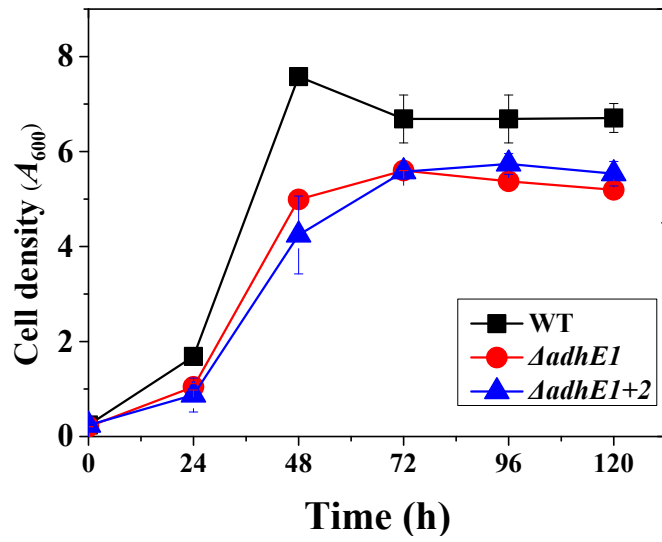

**Fig. S2** Growth profiles of *C. ljungdahlii* WT and *adhE* gene deletion mutants on YTF medium.

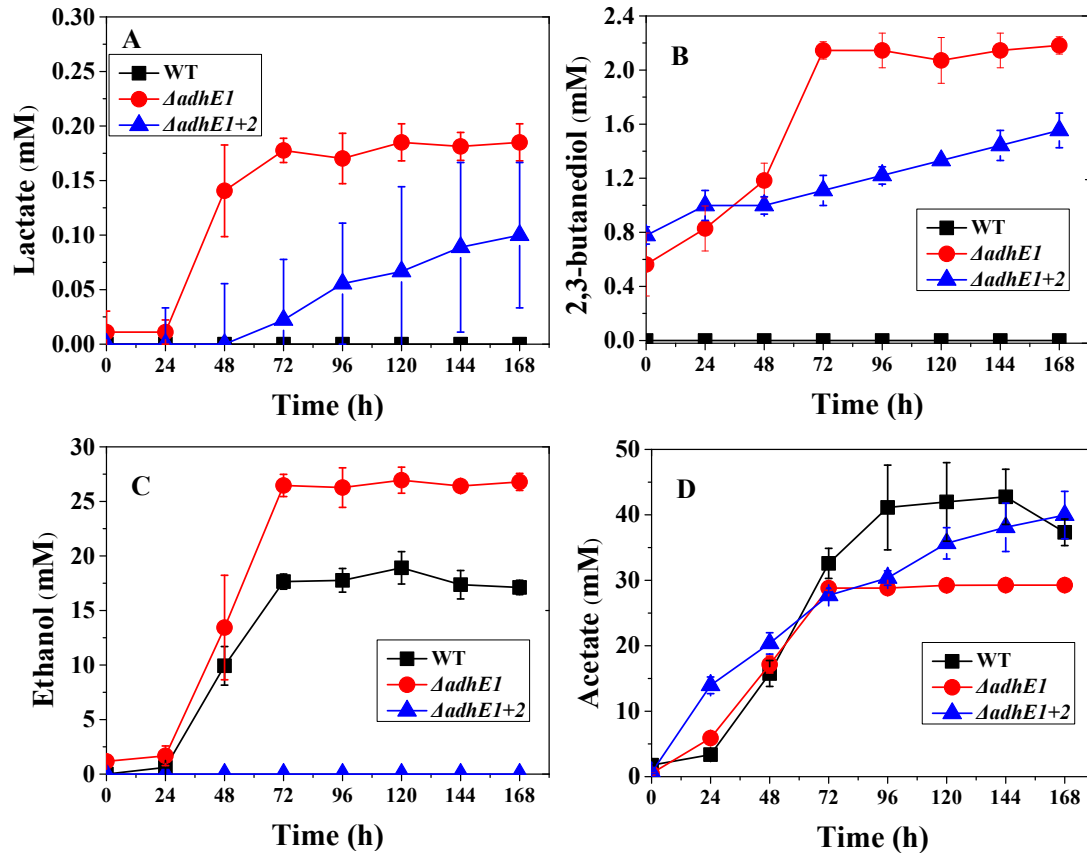

**Fig. S3** Product profiles of *C. ljungdahliae* WT and *adhE* deletion mutants grown on fructose. (A): Lactate; (B): 2,3-butanediol; (C): Ethanol; (D): Acetate.

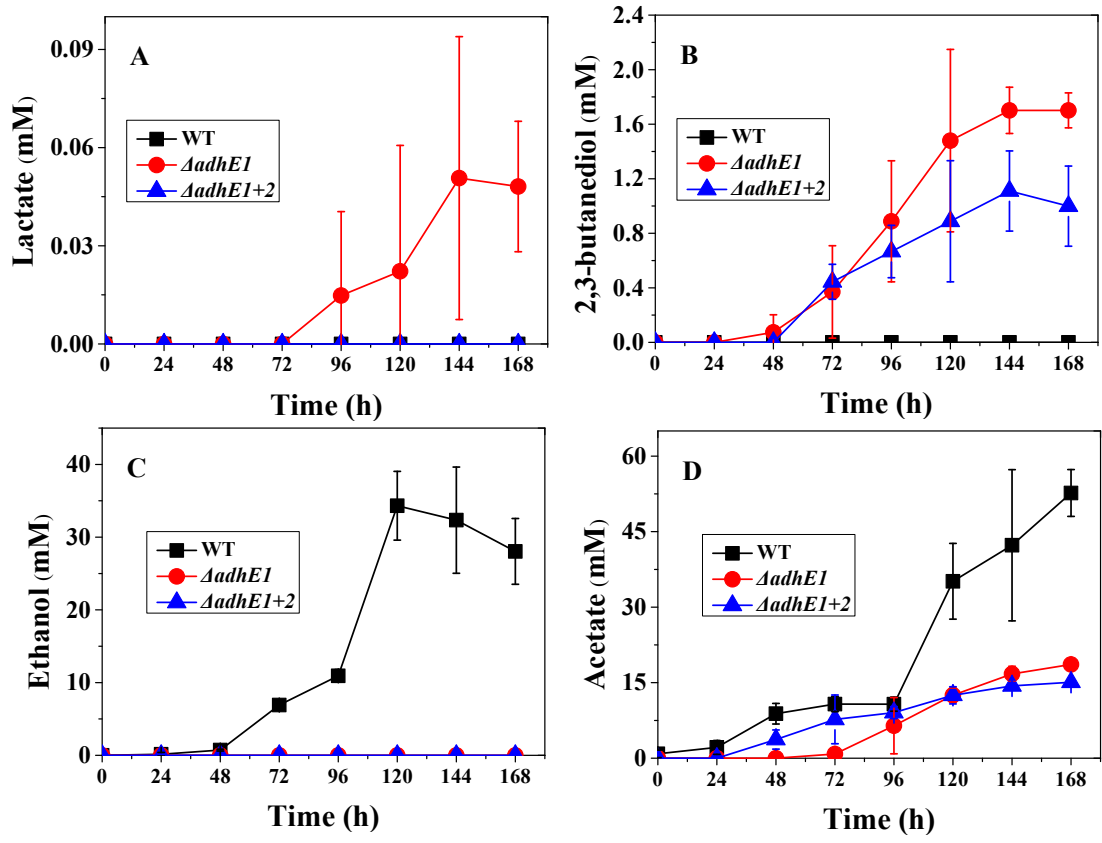

**Fig. S4** Product profiles of *C. ljungdahliae* WT and *adhE* deletion mutants grown on CO:CO<sub>2</sub> (80:20, v/v). (A): Lactate; (B): 2,3-butanediol; (C): Ethanol; (D): Acetate.



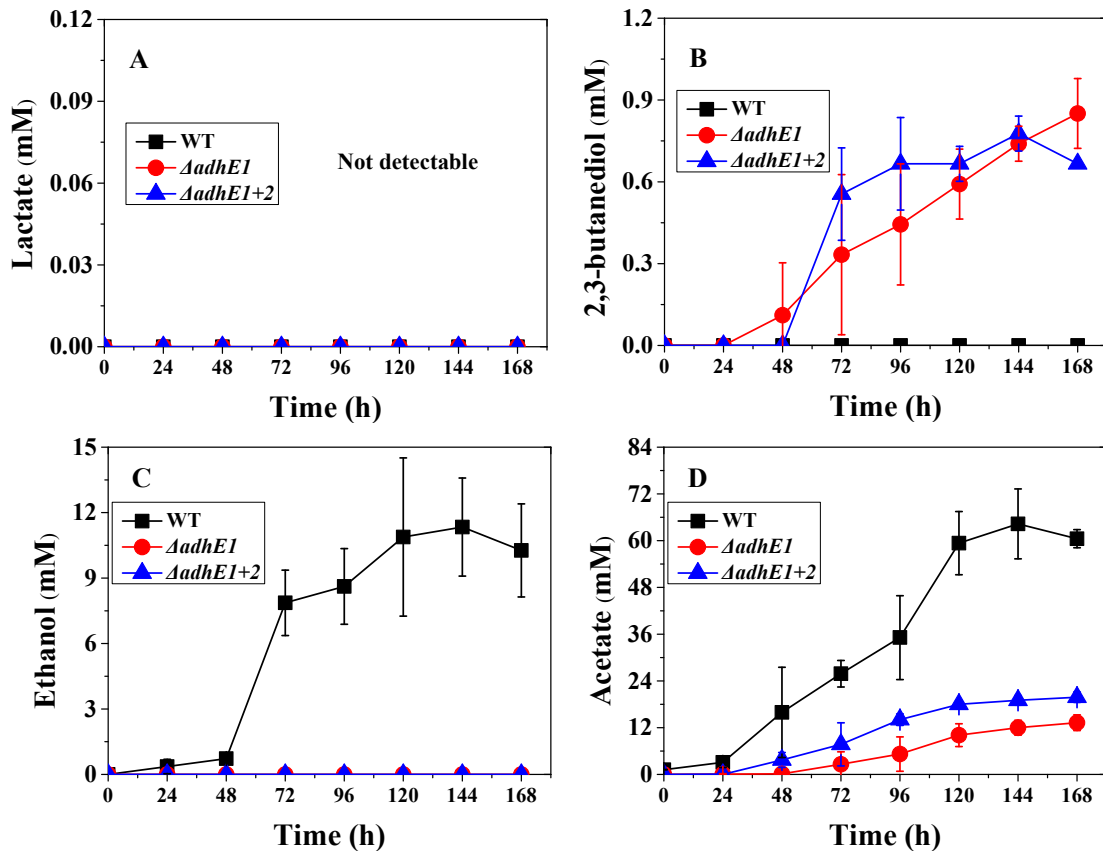

**Fig. S5** Product profiles of *C. ljungdahliae* WT and *adhE* deletion mutants grown on CO<sub>2</sub>:H<sub>2</sub> (60:40, v/v). (A): Lactate; (B): 2,3-butanediol; (C): Ethanol; (D): Acetate.

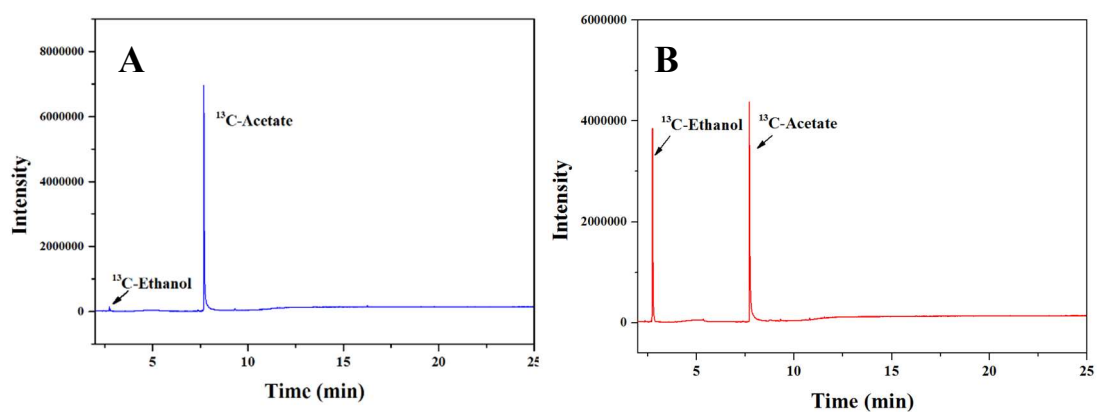

**Fig. S6** Detection of  $^{13}\text{C}$  labeled products after incubation of *C. ljungdahlii* WT cells in fresh medium with  $^{13}\text{C}$ -acetate (A) or  $^{13}\text{C}$ -ethanol (B) for 12 h under anaerobic condition.

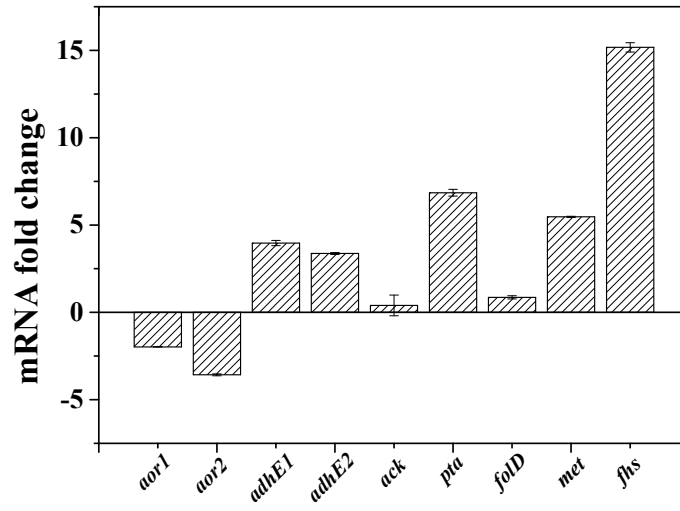

**Fig. S7** Comparison of gene expression levels of *C. ljungdahlii* between exponential and stationary growth phases.
